# Supplementary material
Source: PubMed Central journal article supplement (PMC5120652)
Supplement: NIHMS801574-supplement-supplement_1.pdf [file NIHMS801574-supplement-supplement_1.pdf]

**Supplementary Table 1. Sex-specific publications listed by year of publication. Pink shaded publications are female-specific studies; blue shaded publications are male-specific studies.**

| Sex-Specific Publications |                                  |                              |                                                                                                                                                                                                                                                                                                                                                                                                                   |                                |
|---------------------------|----------------------------------|------------------------------|-------------------------------------------------------------------------------------------------------------------------------------------------------------------------------------------------------------------------------------------------------------------------------------------------------------------------------------------------------------------------------------------------------------------|--------------------------------|
| Publication               | Subjects                         | Modality/Task                | Main Results                                                                                                                                                                                                                                                                                                                                                                                                      | Evoked vs. Non-evoked Paradigm |
| <b>2015</b>               |                                  |                              |                                                                                                                                                                                                                                                                                                                                                                                                                   |                                |
| Farmer et al. 2015        | IC/PBS= 34<br>HC = 32            | DTI (FA)                     | <u>IC/PBS vs. HC</u><br>- Patients had ↓ FA in anterior thalamic radiation, forceps major and longitudinal fasciculus.<br>- Patients had ↑ in superior and bilateral inferior longitudinal fasciculi                                                                                                                                                                                                              | Non-evoked paradigm            |
| Gupta et al. 2015         | LPVD = 29<br>IBS = 29<br>HC = 29 | Resting fMRI                 | <u>LPVD vs. HC</u><br>- Patients showed ↑ connectivity between SMA and somatosensory network<br>- Patients had ↑connectivity between GP, aMCC, putamen and salience network, but ↓ connectivity between orbital mPFC and salience network<br>Patients had ↑ connectivity between angular gyrus and anterior precuneus and the DMN, but ↓ connectivity between posterior precuneus, dorsal and ventral PCC and DMN | Non-evoked paradigm            |
| Hubbard et al. 2015       | IBS = 15<br>HC = 14              | fMRI (modified flanker task) | <u>IBS vs. HC</u><br>- Patients had ↓ reaction times during the alerting and orienting conditions which were associated with ↑activation of aMCC and INS, and ↓activity in inferior frontal and SMA                                                                                                                                                                                                               | Evoked non-pain paradigm       |

|                    |                         |                                                  |                                                                                                                                                                                                                                                                                                  |                      |
|--------------------|-------------------------|--------------------------------------------------|--------------------------------------------------------------------------------------------------------------------------------------------------------------------------------------------------------------------------------------------------------------------------------------------------|----------------------|
| Kutch et al. 2015  | CP/CPPS = 28<br>HC = 27 | Resting fMRI                                     | <u>CP/CPPS vs. HC</u><br>- Patients had ↑ connectivity between the motor cortex and pINS                                                                                                                                                                                                         | Non-evoked paradigm  |
| Kairys et al. 2015 | IC/PBS = 33<br>HC = 33  | MRI (GMV)                                        | <u>IC/PBS vs. HC</u><br>- Patients had ↑ GMV SI, superior parietal, SMA                                                                                                                                                                                                                          | Non-evoked paradigm  |
| Labus et al. 2015  | IBS = 106<br>HC = 106   | MRI (CT, GMV, shape)                             | <u>IBS vs. HC</u><br>- Morphometry of primary sensorimotor cortices is most predictive brain variable for IBS                                                                                                                                                                                    | Non-evoked paradigm  |
| Liu et al. 2015    | MIGR = 135<br>HC = 111  | MRI (GMV); Resting fMRI; COMT val158met genotype | <u>MIGR vs. HC</u><br>- Val homozygote patients had ↑ HIPP GMV and ↓ HIPP functional connectivity with mPFC, OFC, PreCG, PosCG, ACC, INS, AMYG<br>- Met carrier patients had ↑ HIPP functional connectivity with PreCG, PCC, precuneus, occipital cortex                                         | Non-evoked paradigm  |
| Liu et al. 2015    | MIGR = 108<br>HC = 30   | Resting fMRI                                     | <u>MIGR vs. HC</u><br>- Duration of disease was correlated with number of resting state functional connectivity abnormalities<br>- Duration of disease was correlated with connectivity strength in OFG, MFG, IFG, INS, SMA, PreCG, PosCG, IPG, and occipital cortex                             | Non-evoked paradigm  |
| Lowen et al. 2015  | IBS = 33<br>HC = 18     | fMRI (habituation to distension)                 | <u>IBS vs. HC</u><br>- Patients with visceral hypersensitivity had ↑ response both to the anticipation and delivery of low intensity rectal distensions in INS, ACC, MCC<br>- Patients without hypersensitivity had IBS-N ↓ decreasing response to repeated rectal distensions in INS, PFC, AMYG | Evoked pain paradigm |
| Maleki et al.      | MIGR = 46               | MRI (CT)                                         | <u>MIGR vs. HC</u>                                                                                                                                                                                                                                                                               | Non-evoked paradigm  |

|                          |                                 |                                                  |                                                                                                                                                                                                          |                          |
|--------------------------|---------------------------------|--------------------------------------------------|----------------------------------------------------------------------------------------------------------------------------------------------------------------------------------------------------------|--------------------------|
| 2015                     | HC = 46                         |                                                  | - In patients, INS does not thin with age                                                                                                                                                                |                          |
| Martucci et al.<br>2015  | UCPPS = 45<br>HC = 45           | Resting fMRI                                     | <u>UCPPS vs. HC</u><br>- Patients had ↑ PCC connectivity with INS, dIPFC, THAL, GP, putamen, AMYG, HIPPO<br>- Patients had ↓ precuneus connectivity with OFC, ACC ventromedial PFC and parietal cortices | Non-evoked paradigm      |
| Rahm et al.<br>2015      | FM = 11<br>HC = 11              | fMRI (visual stimuli)                            | <u>FM vs. HC</u><br>- Patients showed ↑ BOLD activity in SMA<br>- During “self-perspective” paradigm patients showed ↑ BOLD activity in SMA, aINS, somatosensory cortices, ACC                           | Evoked non-pain paradigm |
| Robinson et al.<br>2015  | FM = 14<br>HC = 12              | MRI (Volume)                                     | <u>FM vs. HC</u><br>- Left AMYG volume was most informative neuroimaging feature in classifying subjects                                                                                                 | Non-evoked paradigm      |
| Sutton et al.<br>2015    | PVD1 = 8<br>PVD2 = 7<br>HC = 15 | MRI (GMD)                                        | <u>PVD1 vs. PVD2</u><br>- PVD1 showed ↓ GMD in pain processing regions                                                                                                                                   | Non-evoked paradigm      |
| <b>2014</b>              |                                 |                                                  |                                                                                                                                                                                                          |                          |
| Bagarinao et al.<br>2014 | CPPS = 33<br>HC = 33            | MRI (GMD)                                        | <u>CPPS vs. HC</u><br>- Patients showed ↑ GMD in SI, pre-SMA, HIPPO, AMYG                                                                                                                                | Non-evoked paradigm      |
| Comasco et al.<br>2014   | PMDD = 31<br>HC = 31            | fMRI (emotion task; 5-HTTLPR and BDNF genotypes) | <u>PMDD vs. HC</u><br>- Patients had ↓ activation in ACC and vmPFC<br><br><u>PMDD Met allele carriers vs. HC Met allele carriers</u><br>- Patients had ↓ fronto-cingulate activation                     | Evoked non-pain paradigm |

|                        |                        |                                   |                                                                                                                                                                                                                                                                                                                                                                                              |                     |
|------------------------|------------------------|-----------------------------------|----------------------------------------------------------------------------------------------------------------------------------------------------------------------------------------------------------------------------------------------------------------------------------------------------------------------------------------------------------------------------------------------|---------------------|
|                        |                        |                                   | in luteal phase                                                                                                                                                                                                                                                                                                                                                                              |                     |
| Ichesco et al. 2014    | FM = 18<br>HC = 18     | Resting fMRI                      | <u>FM vs. HC</u><br>Patients showed ↑ functional connectivity between<br>- 1. Right mINS cortex and right mid/poster cingulate cortex<br>- 2. Right pINS cortex and left cingulate cortex<br>- 3. Right aINS cortex and left STG<br><br>HCs showed ↑ functional connectivity between<br>- 1. Left aINS cortex and bilateral medial frontal gyrus, ACC<br>- 2. Left pINS cortex and right SFG | Non-evoked paradigm |
| Khan et al. 2014       | BMS = 9<br>HC = 9      | MRI (GMV); Resting fMRI; DTI (FA) | <u>BMS vs. HC:</u><br>- Patients had ↑ GMV and lower FA in HIPP and ↓ GMV in mPFC.<br>- Patients had ↑ mPFC-HIPP connectivity<br>- mPFC connectivity was ↑ with ACC, AMYG, vmPFC, occipital cortex during high pain state compared to lower pain state in patients                                                                                                                           | Non-evoked paradigm |
| Kilpatrick et al. 2014 | IC/PBS = 82<br>HC = 85 | Resting fMRI                      | <u>IC/PBS vs. HC</u><br>- Patients showed ↑ INS frequency; ↓ sensorimotor frequency (PosCG, paracentral, SMA); ↑ sensorimotor functional connectivity with midbrain and cerebellum                                                                                                                                                                                                           | Non-evoked paradigm |
| Kim et al. 2014        | MIGR = 56<br>HC = 34   | MRI (CT)                          | <u>MIGR vs. HC</u><br>- Patients showed ↑ CT in MFG, PosCG                                                                                                                                                                                                                                                                                                                                   | Non-evoked paradigm |
| Labus et al. 2014      | IBS = 82<br>HC = 119   | MRI (GMV)                         | <u>IBS vs. HC</u><br>- Patients had ↓ volumes in bilateral SFG, INS, HIPP, mOFG, left cingulate, left gyrus rectus, brainstem and left putamen                                                                                                                                                                                                                                               | Non-evoked paradigm |

|                            |                               |                                          |                                                                                                                                                                                                                            |                          |
|----------------------------|-------------------------------|------------------------------------------|----------------------------------------------------------------------------------------------------------------------------------------------------------------------------------------------------------------------------|--------------------------|
|                            |                               |                                          | - Patients had ↑ volumes in the left PosCG                                                                                                                                                                                 |                          |
| Lopez-Sola et al. 2014     | FM = 35<br>HC = 25            | fMRI (Non-painful multi-sensory stimuli) | <u>FM vs. HC</u><br>- Female FM showed ↓ responses in visual and auditory areas<br>- Female FM showed ↑ response in INS                                                                                                    | Evoked non-pain paradigm |
| Martinsen et al. 2014      | FM = 29<br>HC = 31            | fMRI (Stroop Color Word Task)            | <u>FM vs. HC</u><br>Patients showed ↑ reaction times, particularly during the incongruent task, and ↓ activity in caudate nucleus, lingual gyrus, temporal areas, and HIPPO during the incongruent task                    | Evoked non-pain paradigm |
| Pujol et al 2014           | FM = 40<br>HC = 36            | Resting fMRI                             | <u>FM vs. HC</u><br>- Patients showed ↓ functional connectivity between PAG and aINS and between SII and primary somatosensory/visual/auditory cortices<br>- Patients showed ↑ functional connectivity between SII and DMN | Non-evoked paradigm      |
| Schmidt-Wilcke et al. 2014 | FM = 18<br>HC = 14            | fMRI (Go/No Go Task)                     | <u>FM vs. HC</u><br>- Patients showed an association between the extent of body pain distribution and ↓ activity in ACC, aMCC, SMA                                                                                         | Evoked non-pain paradigm |
| Shin et al. 2014           | Vestibular<br>MIGR = 2        | PET (FDG)                                | <u>Ictal vs. Interictal</u><br>- Activation of bilateral cerebellum and frontal cortices<br>- Deactivation of bilateral posterior parietal and occipitotemporal areas                                                      | Non-evoked paradigm      |
| Sundermann et al. 2014     | FM = 17<br>RA = 16<br>HC = 17 | Resting fMRI                             | <u>FM vs. RA vs. HC</u><br>- Multivariate pattern analysis did not differentiate groups beyond trends                                                                                                                      | Non-evoked paradigm      |
| Zhao et al. 2014           | MIGR = 19<br>HC = 20          | Resting fMRI (ReHo)                      | <u>MIGR vs. HC</u><br>- Abnormal regional homogeneity changes found in patients in the putamen, OFC, SII, brainstem and THAL                                                                                               | Non-evoked paradigm      |

| <b>2013</b>            |                                                                  |                          |                                                                                                                                                                                |                          |
|------------------------|------------------------------------------------------------------|--------------------------|--------------------------------------------------------------------------------------------------------------------------------------------------------------------------------|--------------------------|
| Baller et al. 2013     | PMDD = 15 (PET), 14 (fMRI)<br>HC = 15 (PET), 14 (fMRI)           | PET, fMRI (n-back task)  | <u>PMDD vs. HC</u><br>- Patients had ↑ PFC activation                                                                                                                          | Evoked non-pain paradigm |
| Berman et al. 2013     | PMDD = 12<br>HC = 13                                             | MRI (GMV)                | <u>PMDD vs. HCs</u><br>- Patients had ↑ GMV in posterior cerebellum                                                                                                            | Non-evoked paradigm      |
| Bouhassira et al. 2013 | IBS = 20<br>HCs = 11                                             | fMRI (rectal distension) | <u>IBS with RIII facilitation vs. IBS with RIII inhibition</u><br>- No significant activation differences<br><br><u>IBS vs. HCs</u><br>- No significant activation differences | Evoked pain paradigm     |
| Ceko et al. 2013       | Young FM = 14<br>Older FM = 14<br>Young HC = 14<br>Older HC = 14 | MRI (GMV, WMV)           | <u>Young FM vs. Older FM</u><br>- Older patients showed ↓ GMV and WMV.<br>- Younger patients showed ↑ GMV in the BG and INS                                                    | Non-evoked paradigm      |
| Fallon et al. 2013     | FM = 16<br>HC = 15                                               | MRI (VBM)                | <u>FM vs. HC</u><br>- Patients showed shape alterations of the lower brainstem, ↓ GMV in the brainstem and precuneus, and ↑ GMV in SI                                          | Non-evoked paradigm      |
| Gingnell et al. 2013   | PMDD = 18<br>HC = 16                                             | fMRI (emotional stimuli) | <u>PMDD vs. HC</u><br>- During luteal phase, patients had ↑ PFC reactivity during anticipation correlated with progesterone                                                    | Evoked non-pain paradigm |
| Gonzalez de la         | MIGR = 27                                                        | PMRS                     | <u>MIGR vs. HC</u>                                                                                                                                                             | Non-evoked paradigm      |

|                     |                                |                                                            |                                                                                                                                                                                                                                                                                                                                                              |                                                   |
|---------------------|--------------------------------|------------------------------------------------------------|--------------------------------------------------------------------------------------------------------------------------------------------------------------------------------------------------------------------------------------------------------------------------------------------------------------------------------------------------------------|---------------------------------------------------|
| Aleja 2013          | HC = 19                        |                                                            | <ul style="list-style-type: none"> <li>- Patients showed ↑ Glu/Gln ratio in occipital cortex</li> <li>- Patients showed ↑ Glu in paracingulate cortex</li> </ul>                                                                                                                                                                                             |                                                   |
| Hampson et al. 2013 | VVD = 24<br>FM = 24<br>HC = 13 | fMRI (thumb pressure and vulvar pressure)                  | <u>VVD vs. HC</u><br><ul style="list-style-type: none"> <li>- VVD showed ↑ activations in the INS, dorsal MCC, PCC, THAL to thumb pain</li> </ul><br><u>VVD &amp; FM vs. HC</u><br><ul style="list-style-type: none"> <li>- VVD &amp; FM showed ↑ activations in the INS to thumb pain</li> </ul>                                                            | Evoked pain paradigm                              |
| Jensen et al. 2013  | FM = 26<br>HC = 13             | MRI (CT, GMV);<br>fMRI (pressure pain)                     | <u>FM vs. HC</u><br><ul style="list-style-type: none"> <li>- Overlap was present in ↓ CT and GMV and functional regional coherence in rostral ACC</li> <li>- Morphometric changes correlated with longer exposure to pain</li> <li>- In patients, morphometric and functional changes in the mesolimbic areas correlated with depression symptoms</li> </ul> | Both evoked pain paradigm and non-evoked paradigm |
| Kamping et al. 2013 | FM = 16<br>HC = 16             | fMRI (visual stimuli and laser pain to left hand)          | <u>FM vs. HC</u><br><ul style="list-style-type: none"> <li>- Patients showed significantly ↑ power in SI, SMA, dIPFC and AMYG</li> </ul>                                                                                                                                                                                                                     | Evoked pain and non-pain paradigm                 |
| Kim et al. 2013     | FM = 19<br>HC = 20             | Resting fMRI                                               | <u>FM vs. HC</u><br><ul style="list-style-type: none"> <li>- Patients showed significantly ↑ frequency power in SI, SMA, dIPFC, AMYG not associated with depression or anxiety</li> </ul>                                                                                                                                                                    | Non-evoked paradigm                               |
| Labus et al. 2013   | IBS = 11<br>HC = 15            | fMRI (CRF-R1 antagonist effects; threat of abdominal pain) | <u>IBS vs. HC</u><br><ul style="list-style-type: none"> <li>- Patients had ↑ CRF-R1 antagonist suppression of pons, mPFC, HIPPO, aINS and midbrain during extinction</li> </ul>                                                                                                                                                                              | Evoked pain paradigm                              |
| Lee et al. 2013     | FM = 23<br>HC = 24             | fMRI (Visual pictures of painful vs. non-painful stimuli)  | <u>FM vs. HC</u><br><ul style="list-style-type: none"> <li>- Patients showed ↓ activation to pain-related stimuli in the THAL, ACC, dIPFC, PreCG, PosCG and SMA</li> </ul>                                                                                                                                                                                   | Evoked pain paradigm                              |

|                         |                       |                              |                                                                                                                                                                                                                                                                                                                                  |                          |
|-------------------------|-----------------------|------------------------------|----------------------------------------------------------------------------------------------------------------------------------------------------------------------------------------------------------------------------------------------------------------------------------------------------------------------------------|--------------------------|
| Liu et al. 2013         | MIGR = 26<br>HC = 26  | MRI (topological properties) | <u>MIGR vs. HC</u><br>- Patients showed longer global distance connection<br>- Patients showed abnormal global topology in structural networks (i.e. ↑ clustering coefficients)                                                                                                                                                  | Non-evoked paradigm      |
| Piche et al. 2013       | IBS = 14<br>HC = 14   | MRI (CT)                     | <u>IBS vs. HC</u><br>-Patients showed ↓ pain inhibition and ↑ pINS thickness<br><br><u>All Subjects:</u> ↑ lateral OFC associated with less pain inhibition                                                                                                                                                                      | Non-evoked paradigm      |
| Qiu et al. 2013         | CLUST = 12<br>HC = 12 | Resting fMRI                 | <u>CLUST vs. HC</u><br>- During pain in attack phase, patients showed ↑ functional connectivity of HYPO with ACC, PCC, SFG, MFG, IFG, STG, IPG, AMYG, and PHG<br>- During out of attack phase, patients showed ↑ functional connectivity of HYPO with IFG, STG, MTG, temporal pole, INS cortex, parahippocampal gyrus, and uncus | Non evoked pain paradigm |
| Rosenberger et al. 2013 | IBS = 15<br>HC = 12   | fMRI (rectal distension)     | <u>IBS vs. HC</u><br>- Patients showed ↑ cerebellular activation associated with anxiety and depression                                                                                                                                                                                                                          | Evoked pain paradigm     |
| Tu et al 2013           | PDM = 32<br>HC = 32   | MRI (GMV)                    | <u>PDM vs. HC (menstruation – periovulatory phase)</u><br>- Patients displayed ↑ GMV changes in the left medial OFC, PreCG, ITG and right HYPO during menstruation<br>- Patients showed ↓ GMV changes in the left SII and ACC/dorsal PCC during menstruation                                                                     | Non-evoked paradigm      |

|                          |                                                                                |                                          |                                                                                                                                                                                                                                                                    |                          |
|--------------------------|--------------------------------------------------------------------------------|------------------------------------------|--------------------------------------------------------------------------------------------------------------------------------------------------------------------------------------------------------------------------------------------------------------------|--------------------------|
| Arkink et al.<br>2012    | MIGR = 29<br>HC = 16                                                           | MRI (perfusion)                          | <u>MIGR vs. HC</u><br>- Patients without aura had ↑ perfusion in MFG, ITG, and MTG, and ↓ perfusion in IFG<br>- Patients with aura had ↓ perfusion in PosCG, ITG                                                                                                   | Non-evoked paradigm      |
| As-Sanie et al.<br>2012  | CPP with ENDO = 17<br>ENDO without CPP = 15<br>CPP without ENDO = 6<br>HC = 23 | MRI (GMV)                                | <u>CPP with ENDO vs. HC</u><br>- Patients showed ↓ GMV in THAL, ACC, putamen, INS<br><u>CPP without ENDO vs. HC</u><br>- Patients showed ↓ GMV in THAL<br><u>ENDO without CPP vs. HC</u><br>- No significant differences                                           | Non-evoked paradigm      |
| Bannbers et al.<br>2012  | PMDD = 14<br>HC = 13                                                           | fMRI (Go/NoGo task)                      | <u>PMDD vs. HC</u><br>- Patients had ↓ activity in parietal areas<br>- Patients had ↑INS activity during luteal phase and ↓ INS activity during follicular phase                                                                                                   | Evoked non-pain paradigm |
| Barke et al.<br>2012     | CLBP = 15<br>HC = 15                                                           | fMRI (phobia-related pictures)           | <u>CLBP vs. HC</u><br>- No difference in fear-related activations                                                                                                                                                                                                  | Evoked non-pain paradigm |
| Burgmer et al.<br>2012   | FM = 17<br>HC = 17                                                             | fMRI (tonic pain in right volar forearm) | <u>FM vs. HC</u><br>- HCs displayed correlations between activity of the dIPFC and sensorimotor cortex with secondary hyperalgesia scores while patients did not.<br>- No group differences in correlations between brain activity and primary hyperalgesia scores | Evoked pain paradigm     |
| Duschek et al.<br>2012   | FM = 25<br>HC = 25                                                             | CBF (thermal stimulation)                | <u>FM vs. HC</u><br>- Patients showed ↑ blood flow response in anterior cerebral arteries                                                                                                                                                                          | Evoked pain paradigm     |
| Ellingson et al.<br>2012 | FM = 11                                                                        | fMRI (heat & cognitive distraction)      | -During distraction, physical activity was positively associated with dIPFC, PCC, PAG activity and negatively associated                                                                                                                                           | Evoked pain paradigm     |

|                      |                      |                          |                                                                                                                                                                                  |                          |
|----------------------|----------------------|--------------------------|----------------------------------------------------------------------------------------------------------------------------------------------------------------------------------|--------------------------|
|                      |                      |                          | with aINS activity<br>-Sedentary time was negatively associated with dIPFC, THAL, SFG, PreCG, and PosCG activity                                                                 |                          |
| Foerster et al. 2012 | FM = 16<br>HC = 17   | PMRS                     | <u>FM vs. HC</u><br>- Patients had ↓ GABA levels in right aINS<br>In patients, ↑ GABA levels in pINS positively correlated with pressure-pain thresholds                         | Non-evoked paradigm      |
| Gingnell et al. 2012 | PMDD = 14<br>HC = 15 | fMRI (emotional faces)   | <u>PMDD vs. HC</u><br>- Patients had ↑ AMYG reactivity in follicular phase correlated with progesterone                                                                          | Evoked non-pain paradigm |
| Hassett et al. 2012  | FM = 66<br>HC = 22   | MRI (GMV)                | <u>FM vs. HC</u><br>- Patients with shorter telomeres showed ↓ GMV in SI, MFG, precuneus                                                                                         | Non-evoked paradigm      |
| Howard et al. 2012   | OA = 16<br>HC = 17   | rCBF                     | <u>OA vs. HC</u><br>Patients showed ongoing pain as represented in SI,SII, INS, cingulate cortex, THAL, AMYG, HIPPP, dorsal midbrain/pontine tegmentum, PAG/nucleus cunneiformis | Non-evoked paradigm      |
| Jensen et al. 2012   | FM = 28<br>HC = 14   | fMRI (pressure pain)     | <u>FM vs. HC</u><br>- Patients displayed ↑ connectivity of the rostral ACC to AMYG, HIPPP, and brainstem and ↓ connectivity of the THAL to OFC                                   | Evoked pain paradigm     |
| Jeong et al. 2012    | PMDD = 15<br>HC = 15 | MRI (GMD)                | <u>PMDD vs. HCs</u><br>- Patients had ↑ GMD in HIPPP and ↓ GMD in PHG                                                                                                            | Non-evoked paradigm      |
| Larsson et al. 2012  | IBS = 44<br>HC = 20  | fMRI (rectal distension) | <u>Hypersensitive IBS vs. Normosensitive IBS &amp; HC</u><br>-Hypersensitive patients had ↑ INS activation and ↓ ACC deactivation                                                | Evoked pain paradigm     |

|                       |                          |                                                  |                                                                                                                                                                                                                                                                                  |                          |
|-----------------------|--------------------------|--------------------------------------------------|----------------------------------------------------------------------------------------------------------------------------------------------------------------------------------------------------------------------------------------------------------------------------------|--------------------------|
| Liu et al. 2012       | MIGR = 43<br>HC = 43     | MRI (GMV); Resting fMRI (topological properties) | <u>MIGR vs. HC</u><br>- Patients showed abnormal global topology with ↑ mean clustering coefficients in both structural and functional networks<br>- Patients showed ↑ betweenness centrality in PreCG, OFG, MTG, ITG, SMA, IPL and ↓ in PHG, ACC, and THAL                      | Non-evoked paradigm      |
| Mordasini et al. 2012 | CP/CPPS = 20<br>HC = 20  | MRI (GMV)                                        | <u>CP/CPPS vs. HC</u><br>- Patients had ↓ GMV in the ACC of the dominant hemisphere<br>- ↓ ACC was positively correlated with Chronic Prostatitis Symptom Index (CPSI) scores and the pain subscale                                                                              | Non-evoked paradigm      |
| Qiu et al. 2012       | CLUST = 12<br>HC = 12    | Resting fMRI                                     | <u>CLUST vs. HC</u><br>- Altered regional homogeneity in ACC, PCC, PFC, INS                                                                                                                                                                                                      | Non-evoked paradigm      |
| Teepker et al. 2012   | CLUST = 7<br>Male HC = 7 | DTI                                              | <u>CLUST vs. HC</u><br>- Patients showed altered white matter in brainstem, frontal lobe, temporal lobe, occipital lobe, internal capsule and on the right side of the THAL and cerebellum.                                                                                      | Non-evoked paradigm      |
| Seo et al. 2012       | FM = 19<br>HC = 22       | fMRI (N-back task)                               | - In patients, inferior frontal cortex was correlated with mild and moderate pain ratings after controlling for anxiety and depression<br>- In patients, left dlPFC, right vlPFC, and right inferior parietal cortex activity was associated with anxiety and depression ratings | Evoked non-pain paradigm |
| Szabo et al. 2012     | MIGR = 17<br>HC = 17     | DTI (FA and MD)                                  | <u>MIGR vs. HC</u><br>- Patients showed ↓ FA in the right frontal white matter cluster<br>- Patients showed ↑ MD in the right frontal white matter cluster                                                                                                                       | Non-evoked paradigm      |

|                              |                      |                                                      |                                                                                                                                                                                                                                                                                                                                                                               |                      |
|------------------------------|----------------------|------------------------------------------------------|-------------------------------------------------------------------------------------------------------------------------------------------------------------------------------------------------------------------------------------------------------------------------------------------------------------------------------------------------------------------------------|----------------------|
|                              |                      |                                                      | - Patients showed ↑ connectivity of the right frontal white matter cluster to the pain network (OFC, INS, THAL, dorsal midbrain)                                                                                                                                                                                                                                              |                      |
| Van der Schueren et al. 2012 | MIGR = 20<br>HC = 18 | PET (CBR1 imaging)                                   | <u>MIGR vs. HC</u><br>- Patients showed ↑ CBR1 binding in ACC mesial temporal, PFC, superior frontal cortices                                                                                                                                                                                                                                                                 | Non-evoked paradigm  |
| <b>2011</b>                  |                      |                                                      |                                                                                                                                                                                                                                                                                                                                                                               |                      |
| Burgmer et al. 2011          | FM = 14<br>HC = 11   | fMRI (anticipation of pain)                          | <u>FM vs. HC</u><br>- Patients had ↑ activation of dIPFC, PAG, and posterior parietal cortex during anticipation of pain                                                                                                                                                                                                                                                      | Evoked pain paradigm |
| Chen et al. 2011             | IBS = 10<br>HC = 16  | DTI (FA)                                             | <u>IBS vs. HC</u><br>-Patients showed ↑ FA in fornix and external capsule adjacent to the right posterior insula.<br>- Pain severity correlated with FA of bilateral aINS and lateral THAL.<br>- Pain unpleasantness correlated with FA of Left aINS.<br>-Pain catastrophizing correlated negatively with FA of cingulum.                                                     | Non-evoked paradigm  |
| Demarquay et al. 2011        | MIGR = 10<br>HC = 10 | PET ([ <sup>18</sup> F]MPPF tracer- 5-HT antagonist) | <u>MIGR vs. HC</u><br>- Patients who developed an odor-triggered MIGRaine attack showed ↑ [ <sup>18</sup> F]MPPF binding potential in the pontine raphe when compared to headache-free MIGR and HCs<br>- Patients who developed a MIGRaine attack showed ↑ [ <sup>18</sup> F]MPPF binding potential in left OFC, PreCG, and temporal pole when compared to headache-free MIGR | Non-evoked paradigm  |

|                        |                         |                                                         |                                                                                                                                                                                                                                |                          |
|------------------------|-------------------------|---------------------------------------------------------|--------------------------------------------------------------------------------------------------------------------------------------------------------------------------------------------------------------------------------|--------------------------|
|                        |                         |                                                         | - No significant differences were observed between headache-free MIGR and HCs                                                                                                                                                  |                          |
| Diers et al. 2011      | FM = 6<br>HC = 6        | fMRI (Intramuscular proton and prostaglandin injection) | <u>FM vs. HC</u><br>- Patients had ↑ activation of left aINS                                                                                                                                                                   | Evoked pain paradigm     |
| Farmer et al. 2011     | CP/CPPS = 16<br>HC = 16 | MRI (GMV) and fMRI (spontaneous pain)                   | <u>CP/CPPS vs. HC</u><br>- No group differences were found in GMV<br>- GMV of aINS and ACC were positively correlated with pain intensity and pain chronicity<br>- Spontaneous pelvic pain correlated with right aINS activity | Non-evoked paradigm      |
| Glass et al. 2011      | FM = 18<br>HC = 14      | fMRI (go/no-go task)                                    | <u>FM vs. HC</u><br>- Patients had ↓ activity in right pre-motor cortex, SMA, MCC, putamen<br>Patients had ↓ activity in right INS cortex and right IFG after controlling for anxiety                                          | Evoked non-pain paradigm |
| Kilpatrick et al. 2011 | IBS = 26<br>HC = 19     | fMRI (emotional and neutral faces; HTR3A genotype)      | - C/C genotype was associated with ↑ generalized AMYG responsiveness regardless of diagnosis                                                                                                                                   | Evoked non-pain paradigm |
| Kim et al. 2011        | FM = 19<br>HC = 22      | fMRI (pressure pain)                                    | <u>FM vs. HC</u><br>- Patients had ↑ bilateral INS activation when exposed to high pressure stimuli                                                                                                                            | Evoked pain paradigm     |
| McLoughlin et al. 2011 | FM = 16<br>HC = 18      | fMRI (thermal pain)                                     | - In patients, physical activity positively correlated with activity in dIPFC, PCC, and pINS<br>- In patients, physical activity negatively correlated with activity in SI and superior parietal cortex                        | Evoked pain paradigm     |
| Rapkin et al. 2011     | PMDD = 12<br>HC = 12    | PET                                                     | <u>PMDD vs. HCs</u><br>- Patients had ↑ cerebellular activity                                                                                                                                                                  | Non-evoked paradigm      |
| Robinson et al. 2011   | FM = 12<br>HC = 14      | MRI (GMV)                                               | <u>FM vs. HC</u><br>- Patients had ↓ GMV in ACC, MCC and                                                                                                                                                                       | Non-evoked paradigm      |

|                           |                     |                                                                                                              |                                                                                                                                                                                                                                                                                                             |                      |
|---------------------------|---------------------|--------------------------------------------------------------------------------------------------------------|-------------------------------------------------------------------------------------------------------------------------------------------------------------------------------------------------------------------------------------------------------------------------------------------------------------|----------------------|
|                           |                     |                                                                                                              | mINS                                                                                                                                                                                                                                                                                                        |                      |
| Seifert et al<br>2011     | CLUST = 7<br>HC = 7 | PET (FDG)                                                                                                    | <u>CLUST vs. HC</u><br>- A positive correlation between depression scores and glucose metabolism in INS cortex<br>A positive correlation between disability scores and glucose metabolism in AMYG                                                                                                           | Non-evoked paradigm  |
| Vincent et al.<br>2011    | DYS = 12<br>HC = 12 | fMRI (thermal stimulation of arm and abdomen)                                                                | <u>DYS vs. HC</u><br>- During menstruation, patients failed to deactivate precuneus, fusiform, entorhinal cortex                                                                                                                                                                                            | Evoked pain paradigm |
| <b>2010</b>               |                     |                                                                                                              |                                                                                                                                                                                                                                                                                                             |                      |
| Blankstein et al.<br>2010 | IBS = 11<br>HC = 16 | MRI (VBM and CT)                                                                                             | <u>IBS vs. HC</u><br>- Patients had ↑ HYPO volume<br>- Patients had ↓ thinning of the aMCC<br>- Negative correlation between dIPFC CT and pain catastrophizing<br>- Positive correlation between aINS CT and pain duration<br>- Short-term IBS had INS thinning, BUT long-term IBS had normal INS thickness | Non-evoked paradigm  |
| Bouloche et al<br>2010    | MIGR = 7<br>HC = 7  | PET- H <sub>2</sub> O <sup>15</sup> (Visual stimulation with/out concomitant trigeminal painful stimulation) | <u>MIGR vs. HC</u><br>Patients showed ↑ activation in cuneus, lingual gyrus and PCC when pain was applied                                                                                                                                                                                                   | Evoked pain paradigm |
| Elsenbruch et al.<br>2010 | IBS = 15<br>HC = 12 | fMRI (rectal distension)                                                                                     | <u>IBS vs. HC</u><br>- During nonpainful distensions, patients had ↑ activation in the vIPFC, INS and aMCC<br>- During painful distensions, patients had ↑ activation in the vIPFC and INS while controls had ↑ activation in the dIPFC and                                                                 | Evoked pain paradigm |

|                        |                     |                          | sgACC                                                                                                                                                                                                                                                                                         |                      |
|------------------------|---------------------|--------------------------|-----------------------------------------------------------------------------------------------------------------------------------------------------------------------------------------------------------------------------------------------------------------------------------------------|----------------------|
| Elsenbruch et al. 2010 | IBS = 15<br>HC = 12 | fMRI (rectal distension) | <u>IBS vs. HC</u><br>- Patients had ↑ activation in the PFC and aINS<br>- Anxiety symptoms were associated with activation of the aMCC and pgACC in patients                                                                                                                                  | Evoked pain paradigm |
| Hall et al. 2010       | IBS = 7<br>HC = 6   | fMRI (rectal distension) | <u>IBS vs. HC</u><br>- Patients had ↑ activation of ACC, INS, vmPFC<br>- Patients failed to downregulate activity in the vmPFC and PCC/precuneus within the DMN<br>- Controls had ↑ activation of THAL, striatal regions and dlPFC                                                            | Evoked pain paradigm |
| Jensen et al. 2010     | FM = 83             | fMRI (pressure pain)     | - Brain activity during pain not modulated by depression, anxiety, or catastrophizing                                                                                                                                                                                                         | Evoked pain paradigm |
| Napadow et al. 2010    | FM = 18<br>HC = 18  | Resting fMRI             | <u>FM vs. HC</u><br>- Patients had ↑ connectivity between DMN and INS cortex<br>Spontaneous pain at the time of the scan was correlated with greater intrinsic connectivity between the INS and both the DMN and the EAN                                                                      | Non-evoked paradigm  |
| Puri et al. 2010       | FM = 5<br>HC = 5    | MRI (GMD)                | <u>FM vs. HC</u><br>- Patients showed ↓ GMD in SMA                                                                                                                                                                                                                                            | Non-evoked paradigm  |
| Tu et al. 2010         | PDM = 32<br>HC = 32 | MRI (GMV)                | <u>PDM vs. HC</u><br>- Female patients had ↓ GMV in the right MFG, mPFC, precuneus, SII, pINS, STG/mINS, right culmen, and left cerebellar tonsil<br>- Female patients showed ↑ GMV in the right posterior PHG/HIPP, ACC/dorsal ACC, PAG, HYPO, precuneus, MTG/STG, and right cerebral tonsil | Non-evoked paradigm  |

| <b>2009</b>         |                                                                                    |                                   |                                                                                                                                                                                                                                                                                                                |                      |
|---------------------|------------------------------------------------------------------------------------|-----------------------------------|----------------------------------------------------------------------------------------------------------------------------------------------------------------------------------------------------------------------------------------------------------------------------------------------------------------|----------------------|
| Burgmer et al. 2009 | FM = 18<br>HC = 19                                                                 | fMRI (tonic pain vs. phasic pain) | <u>FM vs. HC</u><br>- Patients showed differences in activity in fronto-cingulate cortex, SMA, and THAL which changed over the time course of pain stimulation and during anticipation of pain                                                                                                                 | Evoked pain paradigm |
| Burgmer et al. 2009 | FM = 14<br>HC = 14                                                                 | MRI (GMV)                         | <u>FM vs. HC</u><br>- Patients showed ↓ GMV in PFC, AMYG, and ACC                                                                                                                                                                                                                                              | Non-evoked paradigm  |
| Harris et al. 2009  | FM = 19<br>HC = 14                                                                 | PMRS                              | <u>FM vs. HC</u><br>- Patients showed ↑ Glu and combined Glu+Gln within right pINS<br>For both groups, higher levels of Glu+Gln within right pINS were associated with lower pressure pain thresholds                                                                                                          | Non-evoked paradigm  |
| Hsu et al. 2009     | FM with affective disorders = 29<br>FM without affective disorders = 29<br>HC = 29 | MRI (GMV)                         | <u>FM with affective disorders vs. FM without affective disorders vs. HC</u><br>- Patients with affective disorders had ↓ left aINS GMV<br>- No difference in left aINS GMV between patients without affective disorders and HCs<br>Negative correlation was found between left aINS cluster and trait anxiety | Non-evoked paradigm  |
| Jensen et al. 2009  | FM = 16<br>HC = 16                                                                 | fMRI (pressure pain)              | <u>FM vs. HC</u><br>- Patients showed ↓ reactivity in rostral ACC                                                                                                                                                                                                                                              | Evoked pain paradigm |
| Pujol et al. 2009   | FM = 9<br>HC = 18                                                                  | fMRI (pressure pain)              | <u>FM vs. HC</u><br>- Patients showed ↑ aINS, BG, ACC activation                                                                                                                                                                                                                                               | Evoked pain paradigm |
| Tu et al. 2009      | PDM = 17<br>HC = 16                                                                | PET (glucose metabolism)          | <u>PDM vs. HC</u><br>- Patients had ↑ regional metabolism in                                                                                                                                                                                                                                                   | Non-evoked paradigm  |

|                       |                      |                                                         |                                                                                                                                                                                                                                                                                          |                      |
|-----------------------|----------------------|---------------------------------------------------------|------------------------------------------------------------------------------------------------------------------------------------------------------------------------------------------------------------------------------------------------------------------------------------------|----------------------|
|                       |                      |                                                         | <p>the PCC and ↓ metabolism in the SII and dIPFC</p> <p>In patients, the offset of menstrual pain was related to:</p> <ul style="list-style-type: none"> <li>- ↑ activity of the PFC/OFC and left ventral posterior THAL</li> <li>↓ activity of the left sensorimotor regions</li> </ul> |                      |
| Wood et al. 2009      | FM = 30<br>HC = 20   | MRI (GMD); PET ([18F]fluoro-L-DOPA)                     | <p><u>FM vs. HC</u></p> <ul style="list-style-type: none"> <li>- Patients showed ↓ GMD in PHG, PCC, ACC</li> <li>- ↓ GMD in PHG associated with dopamine metabolism from VTA</li> </ul>                                                                                                  | Non-evoked paradigm  |
| Wood et al. 2009      | FM = 16<br>HC = 8    | SPECT                                                   | <p><u>FM vs. HC</u></p> <ul style="list-style-type: none"> <li>- Patients showed ↓ ratio of N-acetylaspartate to creatine in HIP</li> </ul>                                                                                                                                              | Non-evoked paradigm  |
| <b>2008</b>           |                      |                                                         |                                                                                                                                                                                                                                                                                          |                      |
| Batra et al. 2008     | PMDD = 12<br>HC = 13 | PMRS                                                    | <p><u>PMDD vs. HC</u></p> <ul style="list-style-type: none"> <li>- Glu/cr plus phosphocreatine levels were significantly ↓ in the mPFC during the luteal phase compared to the follicular phase for both PMDD and HC</li> <li>- No diagnosis x phase effects were found</li> </ul>       | Non-evoked paradigm  |
| Berman et al. 2008    | IBS = 14<br>HC = 12  | fMRI (rectal distension)                                | <p><u>IBS vs. HC</u></p> <ul style="list-style-type: none"> <li>- During cued anticipation, patients had ↑ activation in the pINS and dorsal brainstem</li> <li>- During distensions, patients had ↑ activation in the dorsal brainstem, dorsal ACC and pINS</li> </ul>                  | Evoked pain paradigm |
| Demarquay et al. 2008 | MIGR = 11<br>HC = 12 | PET- H <sub>2</sub> O <sup>15</sup> (olfactory stimuli) | <p><u>MIGR vs. HC</u></p> <p>During both olfactory and non-olfactory conditions, patients showed ↑ activation in left temporal pole and ↓ activation in</p>                                                                                                                              | Non-evoked paradigm  |

|                          |                      |                                                                |                                                                                                                                                                                                                                                                                       |                                                       |
|--------------------------|----------------------|----------------------------------------------------------------|---------------------------------------------------------------------------------------------------------------------------------------------------------------------------------------------------------------------------------------------------------------------------------------|-------------------------------------------------------|
|                          |                      |                                                                | frontal and temporal parietal regions, PCC, and right locus coeruleus                                                                                                                                                                                                                 |                                                       |
| Guedj et al. 2008        | FM = 20<br>HC = 10   | SPECT                                                          | <u>FM vs. HC</u><br>- Patients showed ↑ perfusion of parietal, SI cortex associated positively with fibromyalgia impact questionnaire (FIQ) scores<br>- Patients showed ↓ perfusion of anterior temporal cortex, which was negatively associated with FIQ.                            | Non-evoked paradigm                                   |
| Lothe et al. 2008        | MIGR = 10<br>HC = 24 | PET (5-HT1A imaging)                                           | <u>MIGR vs. HC</u><br>- Patients showed ↑ 5-HT1A binding potential in HIPPP, IPL, PosCG, precuneus, STG, MTG                                                                                                                                                                          | Non-evoked paradigm                                   |
| Lutz et al. 2008         | FM = 30<br>HC = 30   | DTI                                                            | <u>FM vs. HC</u><br>- Patients showed ↓ FA in both thalami, thalamocortical tracts and insular regions<br>- Patients showed ↑ GMV in the PosCG, AMYG, HIPPP, SFG, and ACC.                                                                                                            | Non-evoked paradigm                                   |
| Ringel et al. 2008       | IBS = 10<br>HC = 10  | fMRI (rectal distension)                                       | <u>IBS vs. HC</u><br>- Patients had ↑ pain, ↑ activity in the left MCC and PCC, and ↓ activity in the left supragenual ACC<br>- Distension-elicited pain correlated with anxiety and anterior PCC activation<br>- Subjects with abuse history showed ↑ activation of left MCC and PCC | Evoked pain paradigm                                  |
| Schmitz et al. 2008      | MIGR = 24<br>HC = 24 | MRI (VBM); Maudsley Attention and Response Suppression Battery | <u>MIGR vs. HC</u><br>- Patients showed ↓ frontal and parietal lobe GMD and ↓ time to task set shifting<br>- In patients, delayed response time correlated with ↓ GMD of the frontal lobes                                                                                            | Both evoked non-pain paradigm and non-evoked paradigm |
| Schweinhardt et al. 2008 | PVD = 14<br>HC = 14  | MRI (GMD)                                                      | <u>PVD vs. HC</u><br>- Patients showed ↑ GMD in PHG, HIPPP, BG related to lower pain threshold and                                                                                                                                                                                    | Non-evoked paradigm                                   |

|                      |                       |                         |                                                                                                                                                                                                                                                                                                                                                     |                     |
|----------------------|-----------------------|-------------------------|-----------------------------------------------------------------------------------------------------------------------------------------------------------------------------------------------------------------------------------------------------------------------------------------------------------------------------------------------------|---------------------|
|                      |                       |                         | increased pain catastrophizing                                                                                                                                                                                                                                                                                                                      |                     |
| <b>2007</b>          |                       |                         |                                                                                                                                                                                                                                                                                                                                                     |                     |
| Chen et al. 2007     | FM = 71<br>HC = 14    | SPECT                   | <u>FM vs. HC</u><br>- Patients showed ↓ rCBF in THAL, BG and temporoparietal areas                                                                                                                                                                                                                                                                  | Non-evoked paradigm |
| Guedj et al. 2007    | FM = 18<br>HC = 10    | SPECT                   | <u>FM vs. HC</u><br>- Patients showed ↑ somatosensory perfusion and ↓ frontal, cingulate, medial temporal and cerebellar perfusion                                                                                                                                                                                                                  | Non-evoked paradigm |
| Harris et al. 2007   | FM = 17<br>HC = 17    | PET (μ-opioid receptor) | <u>FM vs. HC</u><br>- Patients showed ↓ binding potential in the NAcc, AMYG, dorsal ACC<br>- Binding potential in the NAcc was negatively correlated with affective pain ratings<br>- Binding potential in the cingulate and striatum was negatively correlated with amount of affective pain                                                       | Non-evoked paradigm |
| Kuchinad et al. 2007 | FM = 10<br>HC = 10    | MRI (GMV)               | <u>FM vs. HC</u><br>- Patients showed ↓ GMV in ACC, INS, medial frontal cortex and ↑ age-associated gray matter loss                                                                                                                                                                                                                                | Non-evoked paradigm |
| Sprenger et al. 2007 | CLUST = 11<br>HC = 11 | PET (FDG)               | <u>CLUST vs. HC</u><br>- When “in bout” was compared to “out of bout”, patients showed ↑ metabolism in pgACC, PCC, PFC, INS, THAL and temporal cortex<br>- When “in bout” was compared to “out of bout”, patients showed ↓ metabolism in cerebellopontine area<br>- Compared to HCs, hypometabolism was observed in pgACC, PFC, and OFC in patients | Non-evoked paradigm |

|                         |                     |                                                                       |                                                                                                                                                                                                                                                                      |                          |
|-------------------------|---------------------|-----------------------------------------------------------------------|----------------------------------------------------------------------------------------------------------------------------------------------------------------------------------------------------------------------------------------------------------------------|--------------------------|
| Wood et al. 2007        | FM = 6<br>HC = 8    | PET ([ <sup>18</sup> F]fluoro-L-DOPA)                                 | <u>FM vs. HC</u><br>- Patients showed ↓ dopamine uptake in THAL, BG, ACC, HIP                                                                                                                                                                                        | Non-evoked paradigm      |
| <b>2006</b>             |                     |                                                                       |                                                                                                                                                                                                                                                                      |                          |
| Albuquerque et al. 2006 | BMS = 8<br>HC = 8   | fMRI (thermal stimulation to trigeminal nerve)                        | <u>BMS vs. HC:</u><br>- Patients showed ↑ activation in right ACC and bilateral precuneus and ↓ activation in THAL, right MFG, right PreCG, left lingual gyrus and cerebellum                                                                                        | Evoked pain paradigm     |
| Lawal et al. 2006       | IBS = 10<br>HC = 10 | fMRI (rectal distension)                                              | <u>IBS vs. HC</u><br>- Patients had ↑ fMRI activity volume but similar % signal change as controls                                                                                                                                                                   | Evoked pain paradigm     |
| Song et al. 2006        | IBS = 12<br>HC = 12 | fMRI (rectal distension with and without ice water immersion of foot) | <u>IBS vs. HC</u><br>- Patients had ↓ activation in aINS, SII, and putamen during rectal stimulation alone<br>- Patients had ↓ activation in SI and right STG and ↑ activation in right inferior lobule and bilateral STG during rectal plus heterotopic stimulation | Evoked pain paradigm     |
| Sprenger et al. 2006    | CLUST = 7<br>HC = 8 | PET (Opioid Receptor)                                                 | <u>CLUST vs. HC</u><br>- ↓ receptor binding in pineal gland                                                                                                                                                                                                          | Non-evoked paradigm      |
| Tanaka et al. 2006      | CFS = 7<br>HC = 7   | fMRI (auditory stimuli during fatiguing visual task)                  | <u>CFS vs. HC</u><br>- Patients showed ↓ responsiveness to auditory stimuli                                                                                                                                                                                          | Evoked non-pain paradigm |
| <b>2005</b>             |                     |                                                                       |                                                                                                                                                                                                                                                                      |                          |
| De Lange et al. 2005    | CFS = 28<br>HC = 28 | MRI (GMV)                                                             | <u>CFS vs. HC</u><br>- Patients showed ↓ in global GMV<br>This decline in GMV was linked to physical activity                                                                                                                                                        | Non-evoked paradigm      |
| Mayer et al. 2005       | IBS = 7<br>UC = 8   | rCBF (rectal distension)                                              | <u>IBS vs. HC</u><br>- Patients showed ↑ activation of the                                                                                                                                                                                                           | Evoked pain paradigm     |

|                          |                            |                                                                  |                                                                                                                                                                                                                                                                                                                 |                          |
|--------------------------|----------------------------|------------------------------------------------------------------|-----------------------------------------------------------------------------------------------------------------------------------------------------------------------------------------------------------------------------------------------------------------------------------------------------------------|--------------------------|
|                          | HC = 7                     |                                                                  | AMYG, rostroventral ACC and dorsomedial frontal cortex                                                                                                                                                                                                                                                          |                          |
| Pukall et al. 2005       | VVS = 14<br>Female HC = 14 | fMRI (pressure to the posterior portion of the vulvar vestibule) | <u>VVS vs. HC</u><br>- Female VVS showed ↑ activations in the INS and frontal cortex                                                                                                                                                                                                                            | Evoked pain paradigm     |
| <b>2004</b>              |                            |                                                                  |                                                                                                                                                                                                                                                                                                                 |                          |
| Cook et al. 2004         | FM = 9<br>HC = 9           | fMRI (thermal stimulation)                                       | <u>FM vs. HC</u><br>- Patients showed ↑ activity in INS during pain<br>- Patients showed ↑ activity in PFC, SMA, INS, ACC during warm stimuli                                                                                                                                                                   | Evoked pain paradigm     |
| De Lange et al. 2004     | CFS = 16<br>HC = 16        | fMRI (motor imagery task and a control visual imagery task)      | <u>CFS vs. HC</u><br>- During the motor imagery task, patients showed ↑ activity in visual structures<br>- In both groups, dorsal ACC was activated during error trials<br>- There was activity in the ventral ACC when HCs made errors, but there was no activity in the ventral ACC when patients made errors | Evoked non-pain paradigm |
| Sidhu et al. 2004        | IBS = 8<br>HC = 8          | fMRI (rectal distension)                                         | <u>IBS vs. HC</u><br>- HC showed differences in cortical volume activated by increasing distension pressure<br>- Patients failed to show differences in cortical volume activated by increasing distension pressure                                                                                             | Evoked pain paradigm     |
| Wilder-Smith et al. 2004 | IBS = 10<br>HC = 10        | fMRI (rectal distension with and without DNIC)                   | <u>IBS-D vs. IBS-C vs. HC during distension alone</u><br>- IBS-D and IBS-C showed ↑ deactivation of AMYG/HIPP and ↓ activation of ACC<br>- IBS-D showed ↓ activation of PFC                                                                                                                                     | Evoked pain paradigm     |

|                       |                         |                                                                                                                    |                                                                                                                                                                                                                             |                          |
|-----------------------|-------------------------|--------------------------------------------------------------------------------------------------------------------|-----------------------------------------------------------------------------------------------------------------------------------------------------------------------------------------------------------------------------|--------------------------|
|                       |                         |                                                                                                                    | <u>IBS-D vs. IBS-C vs. HC during distension with DNIC</u><br>- IBS-D and IBS-C showed ↓ deactivation of aINS<br>- IBS-D showed ↓ activation of ACC, PCC, and PFC<br>- IBS-C showed ↑ activation of THAL, OFC, and AMYG/HIPP |                          |
| Yunus et al. 2004     | FM = 12<br>HC = 7       | PET (FDG)                                                                                                          | <u>FM vs. HC</u><br>- There were no differences between patients and HCs in all brain structures                                                                                                                            | Non-evoked paradigm      |
| <b>2003</b>           |                         |                                                                                                                    |                                                                                                                                                                                                                             |                          |
| Chang et al. 2003     | IBS = 10<br>IBS+FM = 10 | rCBF (rectal distension)                                                                                           | <u>IBS vs. IBS+FM</u><br>- ↑ rCBF to MCC with noxious visceral stimuli in IBS, but with somatic stimuli in IBS+FM                                                                                                           | Evoked pain paradigm     |
| Hagelberg et al. 2003 | AFP = 8<br>HC = 11      | PET [ <sup>18</sup> F]DOPA and D1 and D2 receptors with [ <sup>11</sup> C]NNC 756 and [ <sup>11</sup> C]raclopride | <u>AFP vs. HC</u><br>- Patients showed ↑ D2 receptor availability in left putamen<br>- Patients showed ↓ D1/D2 ratio in the bilateral putamen<br>- Patients ↑ uptake of [ <sup>11</sup> C]raclopride in the left putamen    | Non-evoked paradigm      |
| Hagelberg et al. 2003 | BMS = 10<br>HC = 11     | PET [ <sup>18</sup> F]DOPA and D1 and D2 receptors with [ <sup>11</sup> C]NNC 756 and [ <sup>11</sup> C]raclopride | <u>BMS vs. HC</u><br>- Patients showed ↑ [ <sup>11</sup> C]raclopride uptake in the left putamen<br>Patients showed ↓ D1/D2 ratio in the left putamen                                                                       | Non-evoked paradigm      |
| Ringel et al. 2003    | IBS = 6<br>HC = 6       | PET (rectal distension)                                                                                            | <u>IBS vs. HC</u><br>- Patients had ↓ ACC and ↑ thalamic activation                                                                                                                                                         | Evoked pain paradigm     |
| Vincent et al. 2003   | MIGR = 5<br>HC = 5      | fMRI (Visual stimuli)                                                                                              | <u>MIGR vs. HC</u><br>-Patients had activation in extrastriate                                                                                                                                                              | Evoked non-pain paradigm |

|                          |                     |                                                                |                                                                                                                                                                                 |                          |
|--------------------------|---------------------|----------------------------------------------------------------|---------------------------------------------------------------------------------------------------------------------------------------------------------------------------------|--------------------------|
|                          |                     |                                                                | cortex<br>-Controls had activation in the medial and anterior OFC                                                                                                               |                          |
| Wik et al. 2003          | FM = 8<br>HC = 8    | PET (rCBF)                                                     | <u>FM vs. HC</u><br>- Patients showed ↑ rCBF in the bilateral retrosplenial cortex<br>- Patients showed ↓ rCBF in the left frontal, temporal, parietal, and occipital cortices  | Non-evoked paradigm      |
| <b>2002</b>              |                     |                                                                |                                                                                                                                                                                 |                          |
| Epperson et al. 2002     | PMDD = 9<br>HC = 14 | SPECT                                                          | <u>PMDD vs. HCs</u><br>- Patients had ↑ cortical GABA levels during luteal phase                                                                                                | Non-evoked paradigm      |
| <b>2001</b>              |                     |                                                                |                                                                                                                                                                                 |                          |
| Hadjikhani et al. 2001   | MIGR = 3            | fMRI (Visual stimuli)                                          | -Patients had focal ↑ in BOLD signal within extrastriate cortex, progressing continuously and slowly over occipital cortex<br>- BOLD signal ↓ following retinotopic progression | Evoked non-pain paradigm |
| Jaaskelainen et al. 2001 | BMS = 10<br>HC = 14 | PET [ <sup>18</sup> F]DOPA                                     | <u>BMS vs. HC</u><br>Patients showed ↓ presynaptic dopaminergic function in the right putamen                                                                                   | Non-evoked paradigm      |
| <b>2000</b>              |                     |                                                                |                                                                                                                                                                                 |                          |
| Kwiatek et al. 2000      | FM = 17<br>HC = 22  | SPECT                                                          | <u>FM vs. HC</u><br>- Patients showed ↓ rCBF in THAL, inferior pontine tegmentum, lentiform nucleus                                                                             | Non-evoked paradigm      |
| Lekander et al. 2000     | FM = 5              | PET (rCBF); [ <sup>15</sup> O]butanol to study immune function | - Negative correlation between natural killer cell activity and activity in secondary somatosensory and motor cortices and                                                      | Non-evoked paradigm      |

|                     |                      |                               |                                                                                                   |                      |
|---------------------|----------------------|-------------------------------|---------------------------------------------------------------------------------------------------|----------------------|
|                     |                      |                               | THAL<br>- Negative correlation between natural killer cell activity and bilateral activity in PCC |                      |
| <b>1999</b>         |                      |                               |                                                                                                   |                      |
| Chugani et al. 1999 | MIGR = 11<br>HC = 8  | PET (5-HT synthesis)          | <u>MIGR vs. HC</u><br>- Patients showed ↑ capacity for serotonin synthesis                        | Non-evoked paradigm  |
| <b>1998</b>         |                      |                               |                                                                                                   |                      |
| May et al. 1998     | CLUST = 17           | rCBF                          | <u>Acute Pain State vs. Non-pain State</u><br>- ↑ activation in HYPO, ACC, INS                    | Non-evoked paradigm  |
| <b>1997</b>         |                      |                               |                                                                                                   |                      |
| DiPiero et al. 1997 | CLUST = 7<br>HC = 12 | CBF (Cold water pressor test) | <u>CLUST vs. HC</u><br>- Patients had ↓ sensorimotor and THAL activation                          | Evoked pain paradigm |
| <b>1995</b>         |                      |                               |                                                                                                   |                      |
| Mountz et al. 1995  | FM = 10<br>HC = 7    | SPECT                         | <u>FM vs. HC</u><br>- Patients showed ↓ rCBF in THAL and caudate                                  | Non-evoked paradigm  |

**Abbreviations - Groups:** IC/PBS, interstitial cystitis/painful bladder syndrome; HC, healthy controls; LPVD, localized provoked vulvodynia; IBS, irritable bowel syndrome; MIGR, migraine; CP/CPSP, chronic prostatitis/ chronic pelvic pain syndrome; MIGR, migraine; UCPPS, urological chronic pelvic pain; FM, fibromyalgia; PVD, provoked vestibulodynia; PMDD, premenstrual dysphoric disorder; BMS, burning mouth syndrome; RA, rheumatoid arthritis; VVD, vulvodynia; CLUST, cluster headache; PDM, primary dysmenorrhea; CPP, chronic pelvic pain; CLBP, chronic lower back pain; OA, osteoarthritis; DYS, dysmenorrhea; CFS, chronic fatigue syndrome; VVS, vulvar vestibulitis syndrome

**Abbreviations – Methods:** DTI, diffusion tensor imaging; FA, fractional anisotropy; fMRI, functional magnetic resonance imaging; CT, cortical thickness; GMD, grey matter density; GMV, grey matter volume; MRI, magnetic resonance imaging;

WMV, white matter volume; VBM, voxel based morphometry; PMRS, Proton Magnetic Resonance Spectroscopy; MD, mean diffusivity; PET, positron emission tomography; CBF, cerebral blood flow; SPECT, Single-photon emission computed tomography;

**Abbreviations – Brain Regions:** SMA, supplementary motor area; aMCC, anterior mid cingulate cortex; mPFC, medial prefrontal cortex; DMN, default mode network; PCC, posterior cingulate cortex; INS, insula; pINS, posterior insula; S1, primary somatosensory cortex; HIPPO, hippocampus; OFC, orbital frontal cortex; PreCG, precentral gyrus; PosCG, postcentral gyrus; ACC, anterior cingulate cortex; AMYG, amygdala; MFG, middle frontal gyrus; IFG, inferior frontal gyrus; IPG, inferior parietal gyrus; MCC, mid cingulate cortex; dlPFC, dorsal lateral prefrontal cortex; THAL, thalamus; GP, globus pallidus; PFC, prefrontal cortex; aINS, anterior insula; vmPFC, ventral medial prefrontal cortex; mINS, mid insula; STG, superior temporal gyrus; SFG, superior frontal gyrus; mPFC, medial prefrontal cortex; mOFG, medial orbital frontal gyrus; SII, secondary somatosensory cortex; PAG, periaqueductal gray; BG, basal ganglia; HYPO, hypothalamus; PHG, parahippocampal gyrus; MTG, middle temporal gyrus; ITG, inferior temporal gyrus; PHG, parahippocampal gyrus; OFG, orbital frontal gyrus; vlPFC, ventrolateral prefrontal cortex; NAcc, nucleus accumbens; pgACC, pregenual anterior cingulate cortex; sgACC, subgenual anterior cingulate cortex; VTA, ventral tegmental area;

**Abbreviations – Other:** COMT, catechol-O-methyltransferase; HTTLPR, serotonin transporter polymorphism; BDNF, Brain-derived neurotrophic factor; FDG, F-fluorodeoxy glucose; RIII, nociceptive flexion reflex; Glu, glutamate, Gln, glutamine; CRF-R1, corticotropin-releasing factor receptor 1; GABA, gamma-Aminobutyric acid; CPSI, Chronic Prostatitis Symptom Index; CBR1, MOR,  $\mu$ - opioid receptor, Type 1 cannabinoid receptor; SCWT, Stroop Color Word Task; HTR3A, 5-hydroxytryptamine (serotonin) receptor 3A; EAN, executive attention network; FIQ, fibromyalgia impact questionnaire;
